# Supplementary material for: Presynaptic stochasticity improves energy efficiency and helps alleviate the stability-plasticity dilemma
Source: eLife journal article supplement (doi:10.7554/elife.69884), 2021-10-18

Presynaptic Consolidation    No Consolidation  
Bayesian Gradient Descent    Elastic Weight Consolidation

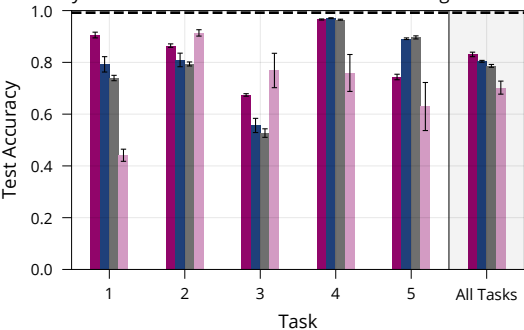

Supplement: supp [file elife-69884-supp-v1.zip]
