# Supplementary material for: Presynaptic stochasticity improves energy efficiency and helps alleviate the stability-plasticity dilemma
Source: eLife journal article supplement (doi:10.7554/elife.69884), 2021-10-18
Supplement: supp [file EWC_FINE_TUNE_DATA.xlsx]

## Sheet: Sheet1
	AVERAGE OF AFTER TASK K OVER TASKS 1 to K
	EWC
		Seed	1	2	3	4	5	6	7	8	9	10
	Task K	1	0.999527	0.999527	0.999054	0.999054	0.999054	0.999054	0.999054	0.999527	0.999527	0.999527
		2	0.848598	0.860233	0.848852	0.859296	0.905969	0.868718	0.87771	0.873936	0.85998	0.898421
		3	0.774331	0.682966	0.681868	0.789217	0.72662	0.658604	0.680504	0.730485	0.689865	0.644063
		4	0.689056	0.810561	0.818459	0.77022	0.66567	0.791008	0.723825	0.795771	0.687072	0.714731
		5	0.60182	0.745712	0.764627	0.687325	0.555298	0.74313	0.727549	0.790919	0.635897	0.77188		0.702416
	Fine Tune
		Seed	1	2	3	4	5	6	7	8	9	10
	Task	1	0.934752	0.949409	0.981087	0.979196	0.986288	0.986761	0.984397	0.929551	0.953192	0.961229
		2	0.813918	0.885112	0.890811	0.889823	0.862407	0.856294	0.858414	0.833355	0.830905	0.854302
		3	0.792679	0.864967	0.848428	0.861027	0.839959	0.864095	0.828699	0.813718	0.821602	0.805764
		4	0.827451	0.853491	0.847722	0.859992	0.846212	0.851647	0.806961	0.842271	0.798959	0.816913
		5	0.768662	0.779448	0.80753	0.784739	0.803108	0.79718	0.785007	0.761103	0.76836	0.809646		0.786478
	PERFORMANCE AFTER FINISHING TRAINING OF TASK R
	EWC
		Seed	1	2	3	4	5	6	7	8	9	10		MEAN	SEM
	Task R	1	0.389125	0.549882	0.546099	0.498345	0.336643	0.470449	0.372577	0.449645	0.382979	0.416076		0.441182	0.0234241
		2	0.956905	0.858472	0.972086	0.942703	0.902057	0.860431	0.924094	0.935847	0.89618	0.889324		0.91381	0.0123106
		3	0.991996	0.420491	0.839381	0.928495	0.995731	0.448773	0.649947	0.927428	0.764141	0.719851		0.768623	0.0664364
		4	0.42145	0.955186	0.926989	0.659617	0.365055	0.973313	0.830312	0.851964	0.647533	0.959215		0.759063	0.0713277
		5	0.249622	0.944529	0.538578	0.407463	0.177005	0.962683	0.860817	0.789713	0.488654	0.874937		0.6294	0.0928639
			0.60182	0.745712	0.764627	0.687325	0.555298	0.74313	0.727549	0.790919	0.635897	0.77188		0.702416	0.0251899
	Fine Tune
		Seed	1	2	3	4	5	6	7	8	9	10
	Task	1	0.790544	0.811348	0.889835	0.86052	0.839243	0.911584	0.85721	0.869976	0.824586	0.866667		0.852151	0.0115293
		2	0.770813	0.766895	0.837904	0.796768	0.802155	0.784035	0.797747	0.725759	0.781587	0.830558		0.789422	0.0101791
		3	0.604589	0.636606	0.581644	0.597118	0.677161	0.681964	0.54429	0.593917	0.513874	0.640875		0.607204	0.0170256
		4	0.93001	0.939074	0.949648	0.934542	0.961732	0.903323	0.920947	0.913394	0.920443	0.93857		0.931168	0.00549386
		5	0.747352	0.743318	0.778618	0.734745	0.73525	0.704992	0.804841	0.702471	0.801311	0.771558		0.752446	0.0113778
			0.768662	0.779448	0.80753	0.784739	0.803108	0.79718	0.785007	0.761103	0.76836	0.809646		0.786478	0.00549257
	FINE TUNE TASK 1 PERFORMANCE OVER TIME
	S	Seed	1	2	3	4	5	6	7	8	9	10
	After task	1	0.934752	0.949409	0.981087	0.979196	0.986288	0.986761	0.984397	0.929551	0.953191	0.961229		0.964586	0.00693619
		2	0.903546	0.947991	0.971631	0.972104	0.95792	0.971158	0.962175	0.912057	0.953191	0.918203		0.946998	0.00826498
		3	0.852009	0.921986	0.879905	0.956974	0.881324	0.940426	0.901182	0.880378	0.912529	0.808511		0.893522	0.0137086
		4	0.854846	0.903073	0.86383	0.939953	0.827423	0.921513	0.829787	0.9026	0.85721	0.780142		0.868038	0.0154922
		5	0.790544	0.811348	0.889834	0.86052	0.839244	0.911584	0.85721	0.869976	0.824586	0.866667		0.852151	0.0115293
			0.144208	0.138061	0.0912529	0.118676	0.147045	0.0751773	0.127187	0.0595745	0.128605	0.0945626		0.112435	0.00962208
	FINE TUNE TASK 1 PERFORMANCE OVER TIME				SMALLEST LR SO THAT 1st TASK LEARNED PROPERLY
	S	Seed	1	2	3	4	5	6	7	8	9	10
	After task	1	0.987707	0.995272	0.996217	0.994799	0.998109	0.994799	0.994326	0.994799	0.991962	0.99669		0.994468	0.000908246
		2	0.960757	0.987234	0.979669	0.980142	0.978251	0.978251	0.97305	0.978723	0.982033	0.955556		0.975366	0.0031016
		3	0.895981	0.910165	0.794326	0.914421	0.806147	0.908747	0.780615	0.893144	0.854374	0.777778		0.85357	0.0183004
		4	0.8487	0.844444	0.798109	0.867139	0.735225	0.875177	0.743262	0.898345	0.793381	0.765485		0.816927	0.0182473
		5	0.704964	0.72766	0.780615	0.758392	0.701182	0.764539	0.722459	0.793381	0.707329	0.734752		0.739527	0.0103958
			0.282742	0.267612	0.215603	0.236407	0.296927	0.23026	0.271868	0.201419	0.284634	0.261939		0.254941	0.0101534	0.0102588
		Overall Average of above FT
			0.794057	0.774646	0.776107	0.790591	0.791675	0.792181	0.76938	0.797117	0.775747	0.781443		0.784294	0.00312662
	FINE TUNE PERFORMANCE After Training				SMALLEST LR SO THAT 1st TASK LEARNED PROPERLY
			0.704965	0.72766	0.780615	0.758392	0.701182	0.764539	0.722459	0.793381	0.707329	0.734752		0.739527	0.0103958
			0.847698	0.75857	0.784525	0.808031	0.803624	0.785015	0.779628	0.779138	0.81048	0.781587		0.79383	0.00778291
			0.587513	0.507471	0.434365	0.553895	0.590181	0.55603	0.473853	0.568837	0.491462	0.504803		0.526841	0.0165035
			0.963746	0.96425	0.972306	0.962236	0.968781	0.965257	0.962739	0.96425	0.951662	0.973313		0.964854	0.00191487
			0.866364	0.91528	0.908724	0.870398	0.894604	0.890066	0.90822	0.87998	0.917801	0.912758		0.89642	0.00602298
