# Supplementary figures and images for: Presynaptic stochasticity improves energy efficiency and helps alleviate the stability-plasticity dilemma
Source: eLife journal article supplement (doi:10.7554/elife.69884), 2021-10-18

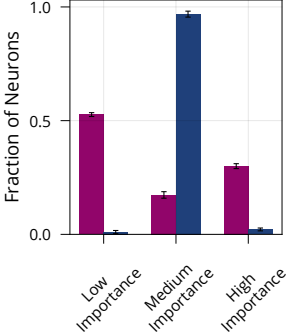

Supplement: supp [file elife-69884-supp-v1.zip]

● True Connectivity

● Shuffled Connectivity

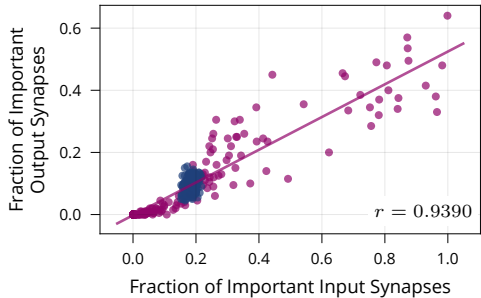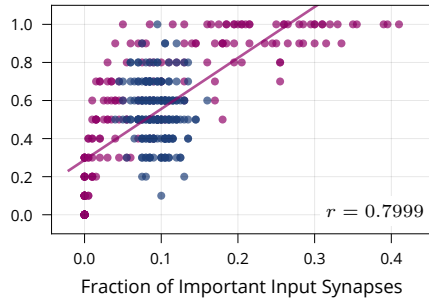

Supplement: supp [file elife-69884-supp-v1.zip]

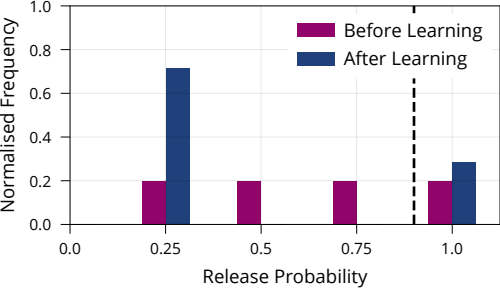

Supplement: supp [file elife-69884-supp-v1.zip]

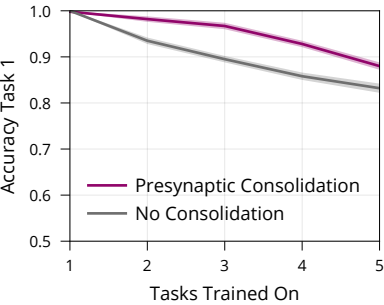

Supplement: supp [file elife-69884-supp-v1.zip]

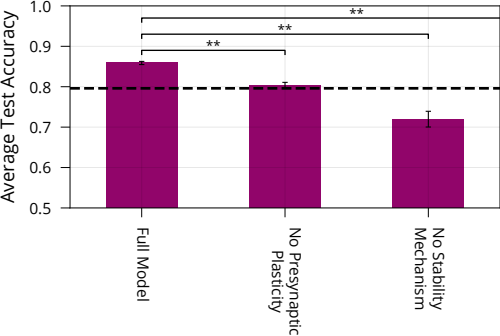

Supplement: supp [file elife-69884-supp-v1.zip]

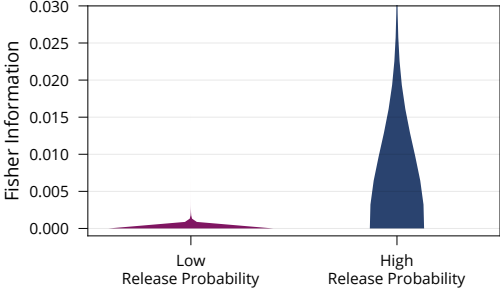

Supplement: supp [file elife-69884-supp-v1.zip]

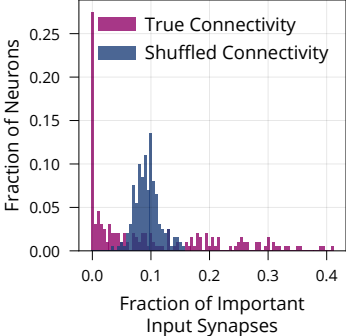

Supplement: supp [file elife-69884-supp-v1.zip]

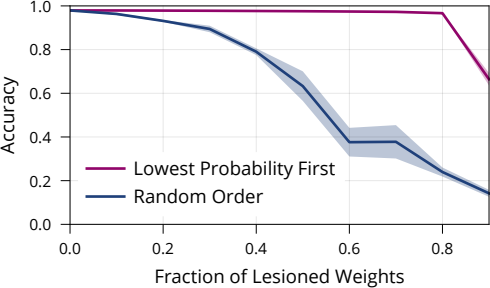

Supplement: supp [file elife-69884-supp-v1.zip]

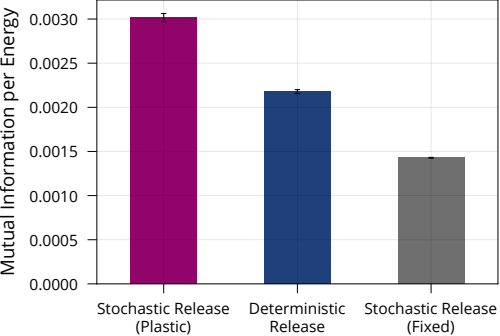

Supplement: supp [file elife-69884-supp-v1.zip]

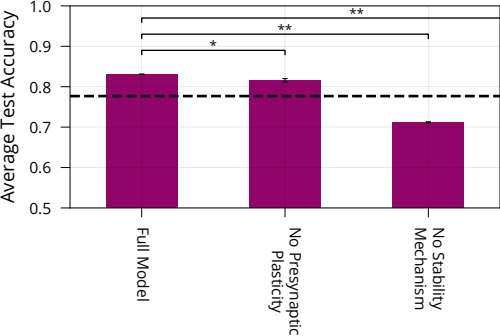

Supplement: supp [file elife-69884-supp-v1.zip]

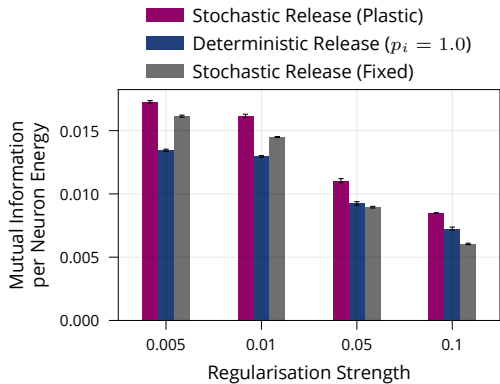

Supplement: supp [file elife-69884-supp-v1.zip]

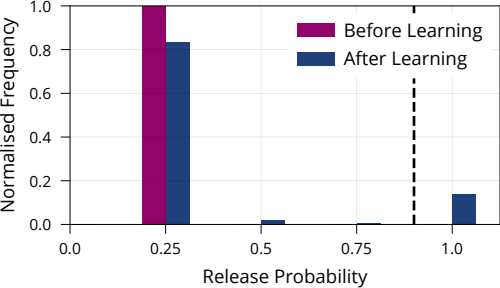

Supplement: supp [file elife-69884-supp-v1.zip]

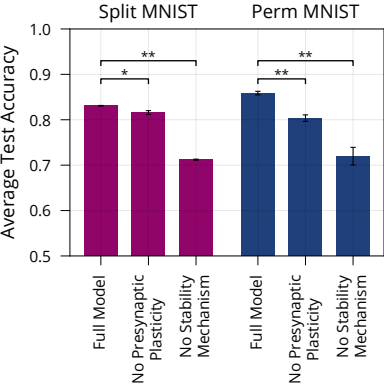

Supplement: supp [file elife-69884-supp-v1.zip]

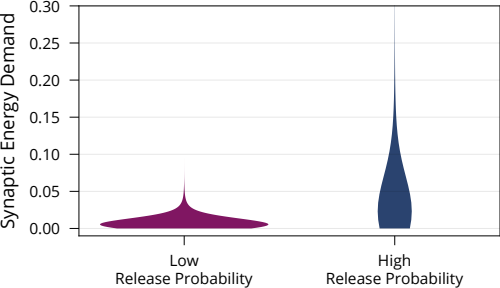

Supplement: supp [file elife-69884-supp-v1.zip]

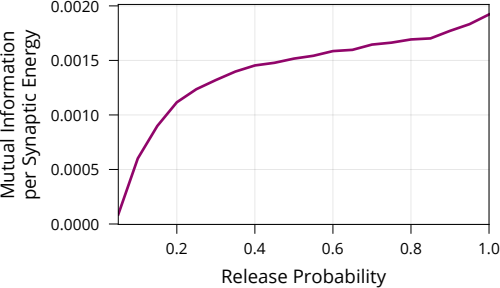

Supplement: supp [file elife-69884-supp-v1.zip]

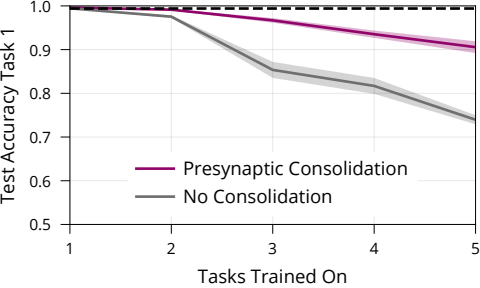

Supplement: supp [file elife-69884-supp-v1.zip]

Average Accuracy

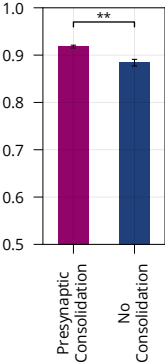

Supplement: supp [file elife-69884-supp-v1.zip]

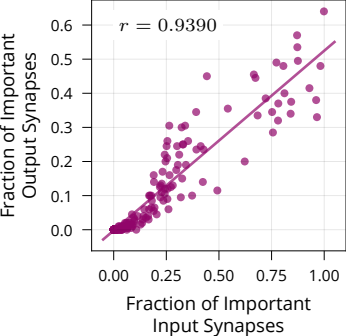

Supplement: supp [file elife-69884-supp-v1.zip]

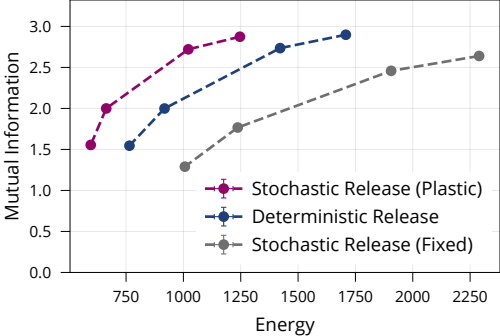

Supplement: supp [file elife-69884-supp-v1.zip]

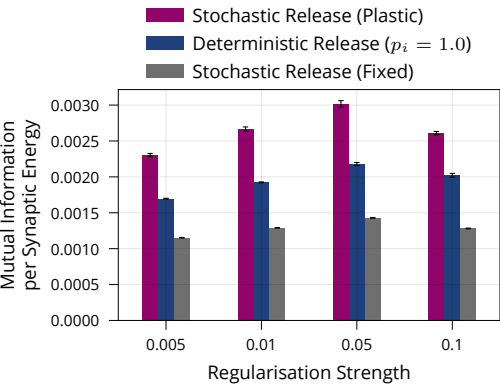

Supplement: supp [file elife-69884-supp-v1.zip]

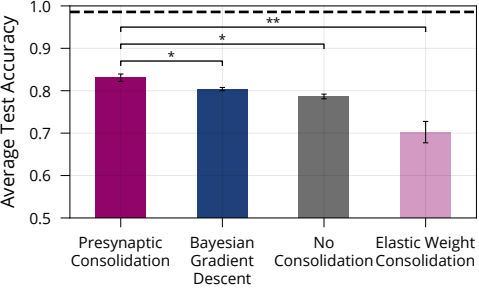

Supplement: supp [file elife-69884-supp-v1.zip]

True Connectivity Shuffled Connectivity

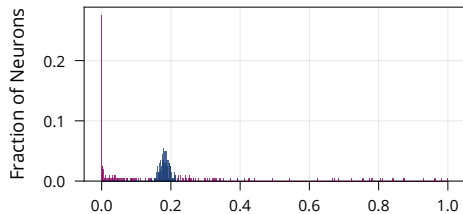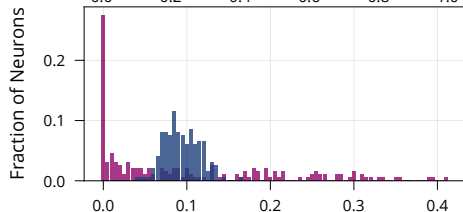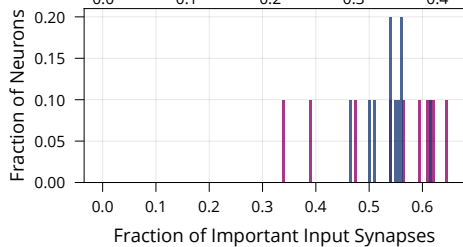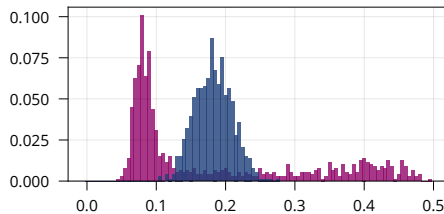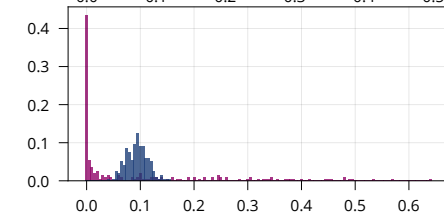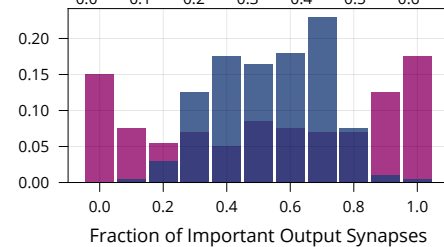

Supplement: supp [file elife-69884-supp-v1.zip]

— Mean Release Probability  
— Ratio of Frozen Release Probabilities

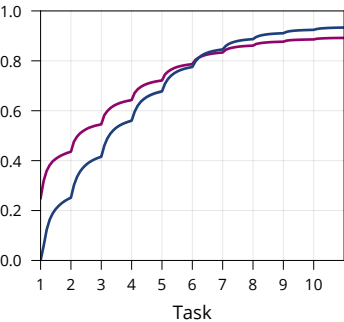

Supplement: supp [file elife-69884-supp-v1.zip]
